# Supplementary material for: The flavoprotein Mcap0476 (RlmFO) catalyzes m5U1939 modification in Mycoplasma capricolum 23S rRNA
Source: PubMed Central journal article supplement (PMC4081110; doi:10.1093/nar/gku518), 2014-06-17
Supplement: supp_gku518_nar-00726-r-2014-File006.pdf [file supp_gku518_nar-00726-r-2014-File006.pdf]

## Supplementary Data

# **The flavoprotein Mcap0476 (RlmFO) catalyzes m<sup>5</sup>U1939 modification in *Mycoplasma capricolum* 23S rRNA**

Carole Lartigue,<sup>1,2\*</sup> Anne Lebaudy,<sup>1,2\*</sup> Alain Blanchard,<sup>1,2</sup>

Basma El Yacoubi,<sup>3</sup> Simon Rose,<sup>4</sup>

Henri Grosjean<sup>5§</sup> & Stephen Douthwaite<sup>4§</sup>

<sup>1</sup> INRA, UMR 1332 de Biologie du Fruit et Pathologie, F-33140 Villenave d'Ornon, France.

<sup>2</sup> Univ. Bordeaux, UMR 1332 de Biologie du Fruit et Pathologie, F-33140 Villenave d'Ornon, France.

<sup>3</sup> Dept. Microbiology and Cell Science, University of Florida, USA.

<sup>4</sup> Dept. Biochem. & Mol. Biol., University of Southern Denmark, DK-5230 Odense M, Denmark.

<sup>5</sup> Centre de Génétique Moléculaire, UPR3404, CNRS, Associée à l'Université Paris Sud 11, FRC 3115, F-91190 Gif-sur-Yvette, France.

\* Contributed equally to this work

§ Correspondence: Henri Grosjean, [henri.grosjean@cgm.cnrs-gif.fr](mailto:henri.grosjean@cgm.cnrs-gif.fr); and Stephen Douthwaite [srd@bmb.sdu.dk](mailto:srd@bmb.sdu.dk)

### **This file includes**

Supplementary Figures 1 to 8

Supplementary Table 1

References

A

Cys53

Mcap0476 MN-KKVKIIGAGLAGCEAAYFLANNDIQVELYEVKTLIKNEVQKTNNFAELVCNTFRSQSLLNNAAGILKAEMRRNLSLVIKIADSKIDGDDALAVDRE  
Mcap0613 MK--TIRIIGAGLSGCEAAYYLLKKGYFVELYEIKTIKKNPIQHYDYFCSELAYSDSFRSTDLNNTSVGTLLKELELLDSLIKAARYASINQNNELVVNRI  
Tther\_TrmFO ME--RVNVVGAAGLAGSEAAWTLLRLGVPVRLFEMRPKRMTPAHGTDRFAEIVCNSNLSGGEGETNAKGLLQAEEMRRAGSLVMEAADLARVPAGGALAVDRE  
Bsubt\_TrmFO MNQQTIVNVIGAGLAGSEAAWQLAKRGIQVKLYEMRVPVKQTPAHHTDKFAELVCNSNLSRNTLANAVGVLKEEMRALDSAIIAAADECSVAGGALAVDRH  
Aaeol\_TrmFO MK-EKVIVIGGAGLAGSEAAWRLANEGHRVILYEMRPPKMTPAHKTGNLAELVCNTLGGLELTTGAGLLKAEMQKLGSLVIEAAKVARVPAGGALGVDRE  
Tmari\_TrmFO M---IVNVIGAGLAGSEVAYNLGKRGIRVRLFEMRPPKMTVEHKTGYFAELVCNSNLSKSEITNAEGLLKAEMRLMGSIITLEAAEKARVPSGKALAVDRN  
\* : :.\*.\*:.\*.\*:\* \* . . \* \*:\*:.. . : . :.\*: \*::: . . . \* \* : \* : . \* : \* \* :

Mcap0476 DFSKKLTDVIKNHPNITIIIEQVNSYIDDENDLTLIATGPLTTNELKEDIQRILIGKQKLFMDASAPIITKDSIDFNKVYYSGRHKQ--KYICPLNEQE  
Mcap0613 EFSKYITNYLKTFFNFKIIEQEYLNIDL-NIPTIIAIGPISPTNFLTNLKLINKENLKLFDTVEPTILKQSINMDICYSLD---NN-LNYLYCDLNKEQ  
Tther\_TrmFO EFSGYITERLTGHPLLEVREVEIREIPP--GITVLATGPLTSEALAEALKRRFGDHFLAYYDAASPIVLYESIDLTKCFRAGRYGQS-ADYLNCPMTEEE  
Bsubt\_TrmFO EFAASVTNRVKNHPNVTVINEEVTEIPE--GPTIIATGPLTSESLSAQLKELTGEDYLYFYDAAPIVEKDSLDMKDYVLYKSRDKGEAAYLNCMTEEE  
Aaeol\_TrmFO IFSEYITEKIESHPNITLIREEVKEIPE-DEVVVIATGPLTSDALSEKIKELVGYDTLYFYDAIPIIVEAESVDFSKGFWGSRYGKGGDDYFNCVLTTEE  
gi|351678177 IFAKEVTEVIERLESVEIIREEVTEFDPEEGIVVATGPPATSDGLLPFLKLLGDDLFFFYDAVSPIVTFESIDMECAFWDGFRGK-KDYINCPLTKEE  
\* : \* : : : : : : : : : : : : : : : : : : : : : : : : : : : : : : : : : : : : : : : : : : : : : : : : : : : : : : : : : :

Cys226

Mcap0476 FNKFVDDLVNAEQVQLKEFEKSIFFK--GCQPIEQAKTSKKLLKLGPMSPNLLDQ--NNQPPYAVVQLRQDDAKDSLNYMVGFQTNLKQPEQKRVFQTI  
Mcap0613 FEKFNALISAKTFNSPLKNEIELLEKNNYFSIESLAKNKQEFI--NHFKPI-----NNNAYITITLKKDSVINNLTYIVNFQTNLMWNEQLKVFSLI  
Tther\_TrmFO YRRFHQALLEAQRHTPHDWEKLEFFE--ACVPVEELARRGYQTLLFGPMKPVGLVDPRTGKEPFAVAVVQLRQEDKAGRMWSLVGFQTGLKQPEQKRLIQMI  
Bsubt\_TrmFO FDRFHEALTSVPLKEFEKEIFFE--GCMPIEVMAKRGKKTMLFGPMKPVGLEHPVTGKRPYAVVQLRQDDAAGTLNIVGFQTHLKWGDQKEVLKLI  
Aaeol\_TrmFO YKKFYEELLKAEKVKPKDFEKAVHFE--GCLPIEEMAERGYKTLLFGPMKPVGLVDPRTGKEPFAVAVVQLRKENKEGTLLSLVGFQTKLTYKEQKRVRLI  
Tmari\_TrmFO YEEFWKALVEAEVIEMEDFDRKLLFE--RCQPIEEIARSGKDALRYGPLRPTGLVDPRTGKEPFAVAVVQLRREDKEGRFYSLVGFQTRLKWSEQKRVLRKI  
: .\* . \* .\*: : . : : . : : . : : \* : \* . . : . : \* . . . . : : \* : : . . : : . : \* . \* . \* : : \* . : : \*

Mcap0476 PGLEKAKIVRYGVMHKNYYINSKPIILFKLQVIRKKNVFFAGQITGVGEYIESASSGIWAAINILAFINNKKIKPLPNTTILGALTNYITNSKIYSLKPM  
Mcap0613 PGLNLKIMKYGVMHKNNYINTKLLNLGVQLKTNKNIFFAGQIIGVDGYVESVCSGLISAINLDRYLNKMIIPKNSTIGSLNYLLKT-DSNFSPM  
Tther\_TrmFO PGLNNAEIVRYGVMHRNTYLNAPRLLGETLEFRAEGLYAAGVLGAGEYVLESAAATGFLAGLNAARKALGLPPVAPPEESMLGGLVRYLATANPEGFP  
Bsubt\_TrmFO PGLNVEIVRYGVMHRNTFINSPLLKPTYQFKNRDLFFAGQMTGVGEYVESASGLVAGINAAKLVLGEEELVIFPQETAIGSMHYITTTNQKNFQPM  
Aaeol\_TrmFO PCLRNAVFVRLGSMHRNTFIQSNKVLTHYLNKKNKKNIFFAGQITGVGEYVASSATGILAGINAGRLARGEKPLKAPTETMLGALVNIVTK-EGELQPM  
Tmari\_TrmFO PCLRNAEIVRYGVMHRNVYINSKPLLDIFFRLKKNHPNIFFAGQITGVGEYMESASGIYVAYNVHRIKGLSPLKLEPMMGALFSAIIEKVEGDLKPM  
\* \* . : : : \* \* \* : \* : : : : : \* . . . : : \* : \* \* : \* : : \* . . : : \* . : \* : : : \* \* : : \* \*

```

Mcap0476      KCNLGILEQENKY-QSNDKFYS--YNNKNSLENYIEQLNKI----LRTNI
Mcap0613      RINWALVDMIGGF-ELSDNSKKIYSKRAIKLIKQYLKKI-----NT
Ttherm_TrmFO  YANWGLVPPVEGRMGKKE-KRQAMYRRGLEAFSAWLSGLNPPLPRPEAALV
Bsubt_TrmFO   NANFGLLKELPVKIKNKKERNEQYANRAIETIQTIS-----KTI
Aaeol_TrmFO   NPVFGLLPPLLEKKVRDKKRKELMAKRALETMEKWIKENNL-VPEGLVKVC
Tmari_TrmFO   YANFGLLPPLKVRVKDKFEKRKLAERALETMCKFLEEN-----PW
      . . . . .

```

## B

|          | Mcap0476 | Mcap0613 | Ttherm | Bsub | Aaeol | Tmari |
|----------|----------|----------|--------|------|-------|-------|
| Mcap0476 |          | 39.0     | 38.4   | 46.5 | 43.4  | 44.0  |
| Mcap0613 | 59.4     |          | 28.4   | 37.7 | 29.4  | 32.7  |
| Ttherm   | 60.0     | 50.4     |        | 50.9 | 52.7  | 51.3  |
| Bsub     | 67.3     | 56.7     | 69.0   |      | 52.9  | 49.3  |
| Aaeol    | 64.2     | 51.7     | 69.2   | 67.6 |       | 54.8  |
| Tmari    | 63.9     | 54.9     | 67.3   | 68.6 | 72.3  |       |

## C

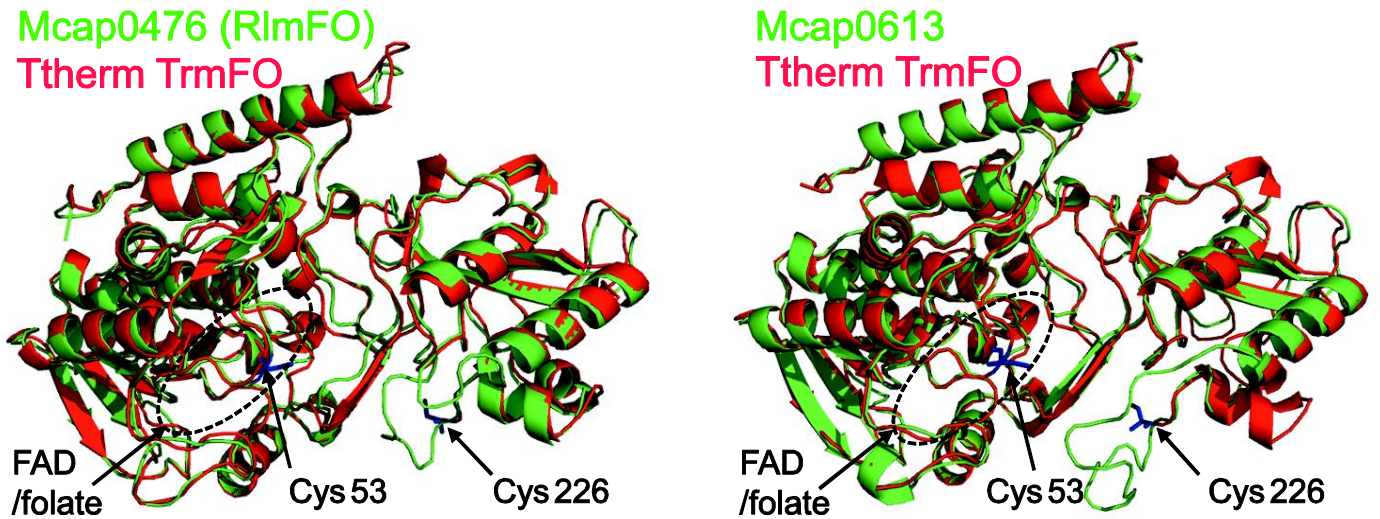

### Supplementary Figure 1. Comparison of TrmFO-like proteins.

(A) Multiple TrmFO sequence alignment generated using ClustalW. TrmFO sequences from *T. thermophilus* (Tther\_TrmsFO), *B. subtilis* (Bsubt\_TrmsFO; the numbering system for this protein is used here), *Aquifex aeolicus* (Aaeol\_TrmsFO) and *Thermotoga maritima* (Tmari\_TrmsFO) are aligned against Mcap0476 and Mcap0613 proteins. The highlighted residues are thought to be involved in the binding of FAD (red), folate (green), GSH (orange) (1,2), tRNA (blue), and the formation of the domain interface (purple). The signature motif for the GSH reductase family (brown highlight) is shown at the N-terminus. Identical residues (\*), conserved substitutions (:), and semi-conserved substitutions (.) are indicated under the sequences. Cys53 (yellow highlight) and Cys226 (green highlight) have been reported to play a major catalytic role in *B. subtilis* TrmsFO (2).

(B) Identity and similarity between TrmsFO-like sequences are indicated respectively as percentages above and below the diagonal, and were calculated from pairwise alignments using the EMBOSS Needle program. This program is available on the EBI web server:

[http://www.ebi.ac.uk/Tools/services/web/toolform.ebi?tool=emboss\\_needle&context=protein](http://www.ebi.ac.uk/Tools/services/web/toolform.ebi?tool=emboss_needle&context=protein)

and uses the Needleman-Wunsch alignment algorithm. Parameters: Matrix, EBLOSUM62; Gap open, 10.0; Gap extend, 0.5; End Gap Penalty, false; End Gap Open Penalty, 10.0; End Gap Extension Penalty, 0.5. Abbreviations as in the sequence alignment.

(C) Structures for the Mcap0476 (RlmsFO) and Mcap0613 proteins were calculated using I-TASSER (3). The closest published match to these models is the crystal structure (PDB 3G5R) of Tther TrmsFO (1). The I-TASSER RlmsFO and Mcap0613 models (green) are shown superimposed onto Tther TrmsFO (red), and can be seen to have essentially the same fold. Both *Mcap* proteins lack an AdoMet binding site (4), but possess structures resembling the  $N^5$ ,  $N^{10}$ -metylenetetrahydrofolate (folate) and FAD binding regions seen in Tther TrmsFO (dashed ellipse). Modelling FAD into the structures using I-TASSER gave a good fit in the TrmsFO, RlmsFO and Mcap0613 proteins. Folate could be easily docked into the TrmsFO structure, although docking of folate into the corresponding regions of the RlmsFO and Mcap0613 proteins would require some structural rearrangement. The estimated accuracy of the model for RlmsFO: confidence (C) score 1.32, template modelling (TM) score  $0.90 \pm 0.06$ . For Mcap0613: C-score 1.50; TM-score  $0.92 \pm 0.06$ . An alternative modelling approach using Phyre2 (5) gave essentially the same folds for the RlmsFO and Mcap0613 proteins (not shown). The catalytically important residues Cys53 and Cys226 (*B. subtilis* TrmsFO numbering) are present in both Tther TrmsFO and RlmsFO, but absent in Mcap0613. These cysteines are 20 Å apart, and it has been suggested for TrmsFO that dimerization occurs upon tRNA binding bringing Cys53 and Cys226 of the two monomer units into close proximity (2).

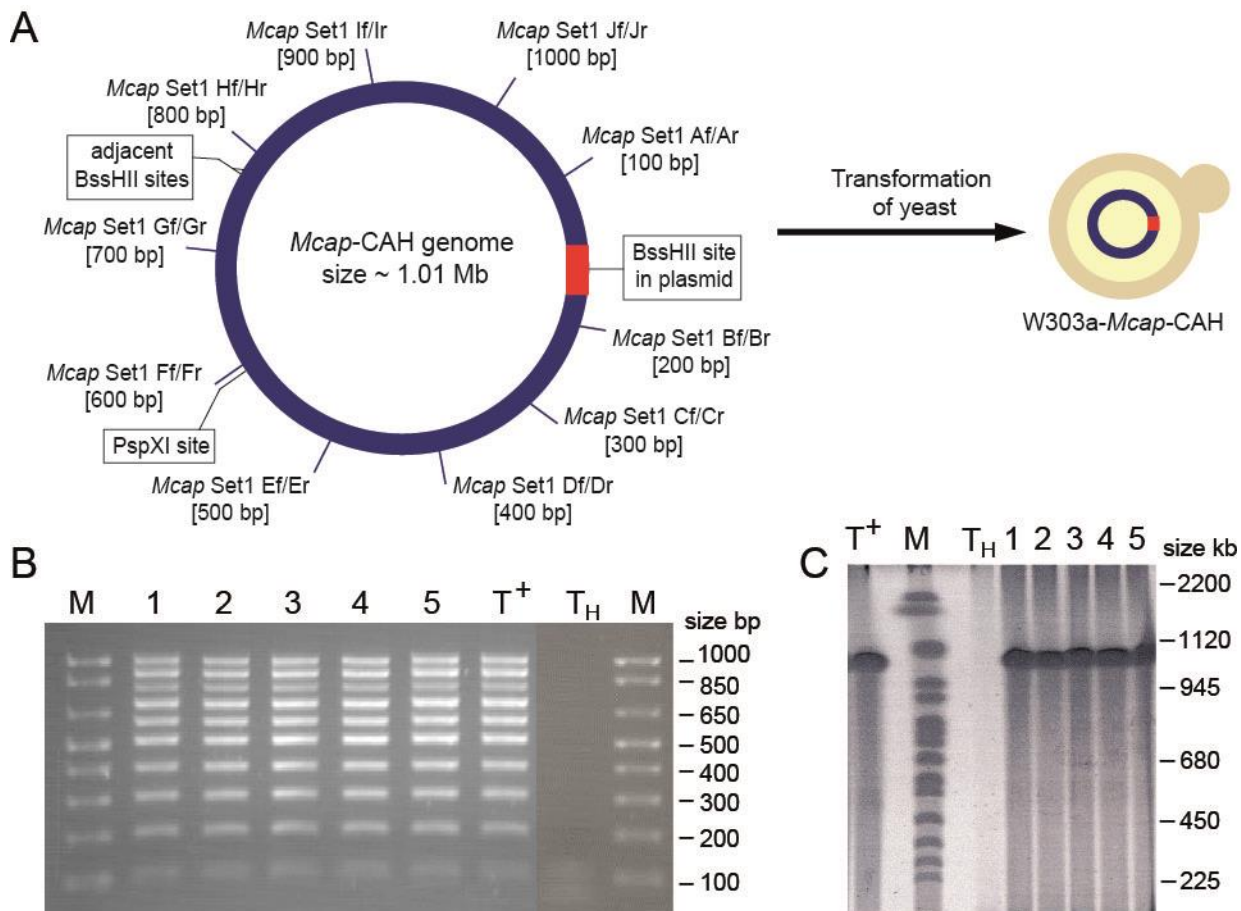

**Supplementary Figure 2.** Cloning of the *Mcap*-CAH genome in yeast. (A) *Mcap*-CAH was obtained by recombination of the plasmid pSD4-puro-CAH- $\Delta$ *Mcap0050* (red rectangle) into the *Mcap*-wt chromosome providing the elements for selection in yeast and mycoplasma (6). The map of the *Mcap*-CAH genome indicates the relative positions of pSD4-puro-CAH- $\Delta$ *Mcap0050*, PCR priming sites and BssHIII and PspXI restriction sites. The engineered genome was isolated in an intact state from *Mcap*-CAH cells and transferred into yeast spheroplasts to form the yeast clone W303a-*Mcap*-CAH, where the *Mcap*-CAH genome was maintained as a centromeric plasmid. (B) *Mcap* genome structures were assessed by multiplex PCR and (C) pulsed-field gel electrophoresis (PFGE). The annealing sites for the set of ten pairs of PCR primers (Supplementary Table 1) are spaced at intervals of about 100 kb around the chromosome. The sizes of the PCR products from each adjacent primer pair differ in increments of 100 bp, such that the intact *Mcap* genome produces a ladder of ten bands. The multiplex PCR pattern is illustrated here with five yeast clones. Yeast clones were analyzed further by PFGE and produced bands matching the expected size of the PspXI-linearized *Mcap*-CAH genome. Clone 2 of W303a-*Mcap*-CAH was used in subsequent steps. Abbreviations: M, DNA size ladders of 100-1,000 bp (Invitrogen) in panel B, or 225–2,200 kb *S. cerevisiae* chromosomal DNA ladder (Bio-Rad) in panel C; T<sup>+</sup>, DNA template from *Mcap*-wt cells; T<sub>H</sub>, negative control without DNA.

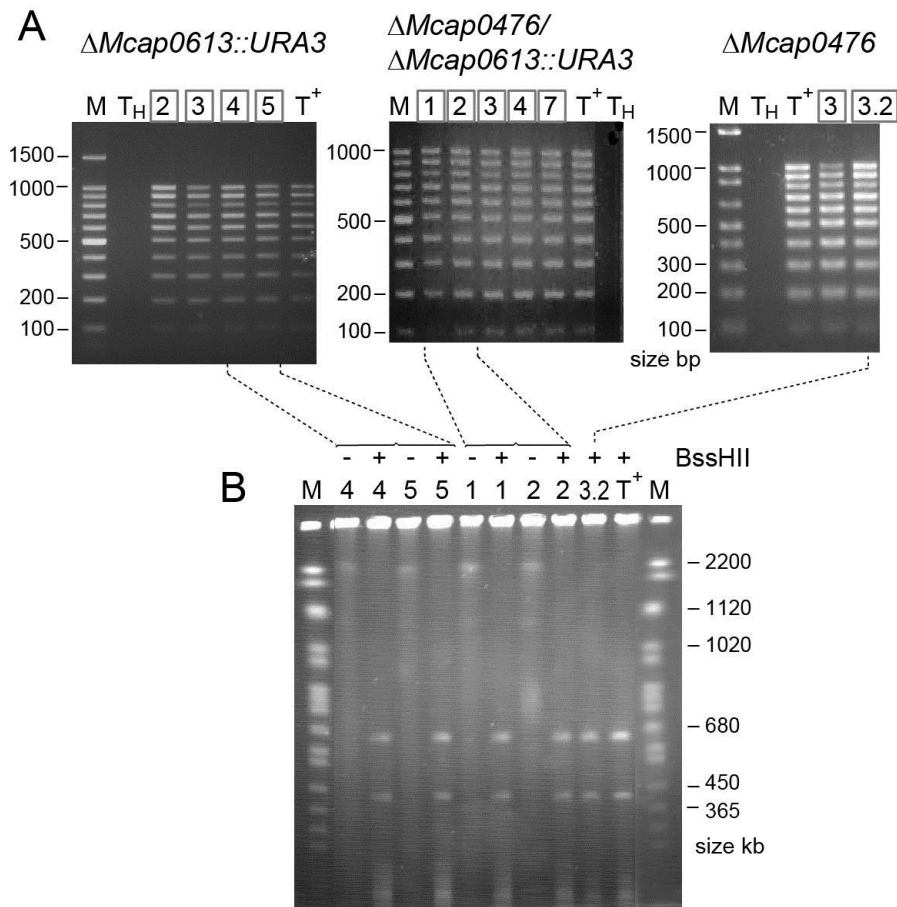

**Supplementary Figure 3.** Multiplex PCR and PFGE analyses of *Mcap* genomes in yeast. **(A)** Multiplex PCR analyses of yeast clones harboring *Mcap*-CAH genomes with single and double knockouts (Figure 2). The band patterns from these candidates are consistent with correctly structured genomes, and W303- $\Delta Mcap0476$  (clone 3.2), W303- $\Delta Mcap0613::URA3$  (clones 4 and 5) and W303- $\Delta Mcap0476/\Delta Mcap0613::URA3$  (clones 1 and 2) were taken for PFGE analysis (dashed lines). **(B)** PFGE served as one of the final checks of *Mcap*-CAH genome structure and size. After removal of yeast genomic DNA, agarose plugs were either mocked digested (-) or digested with BssHII (+) and separated by PFGE. The *Mcap*-CAH genome contains three BssHII sites (Supplementary Figure 2), two of which are too close together to be distinguished by PFGE; digestion of the selected clones with BssHII gave rise to the expected bands of 389 kb and 621 kb. Bands in the mock digestion are the linear form of the *Mcap*-CAH genome caused by mechanical breaks, and a ~2.2 Mb band from residual yeast DNA. Abbreviations as in Supplementary Figure 2.

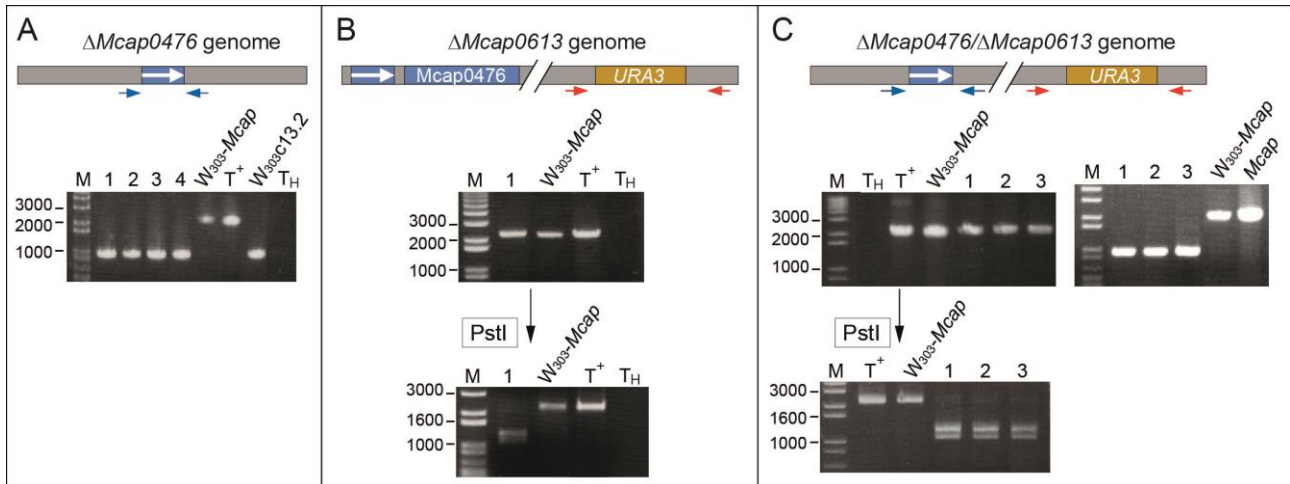

**Supplementary Figure 4.** Analyses of *Mcap*-CAH genomes after transplantation back into *Mcap* cells. Intact *Mcap*-CAH mutant genomes were isolated from the yeast recombinants W303- $\Delta$ *Mcap0476* clone 3.2, W303- $\Delta$ *Mcap0613*::*URA3* clone 4 and W303- $\Delta$ *Mcap0476*- $\Delta$ *Mcap0613*::*URA3* clone 2. The genomic DNA was transplanted back into *Mcap*-wt recipient cells as described above. Deletion of *Mcap0476* (Figure 2A) and/or the replacement of *Mcap0613* by the *URA3* cassette (Figure 2B) was then verified by PCR as shown here for the single knock-out mutants (A) *Mcap* $\Delta$ 0476 and (B) *Mcap*- $\Delta$ 0613 and (C) the double mutant *Mcap* $\Delta$ 0476/ $\Delta$ *Mcap0613*. Deletion of *Mcap0476* was tested for in panels A and C using the PCR primer pair TrmFO15a and TrmFO16 (Supplementary Table 1) positioned on each side of *Mcap0476* (blue arrows). PCR products of 2 kb indicated that *Mcap0476* was intact in W303-*Mcap*-CAH, whereas the 1 kb band from clones 1, 2, 3 and 4 showed that *Mcap0476* had been seamlessly deleted. Replacement of *Mcap0613* by *URA3* in panels B and C was tested with the PCR primer pair TrmFO25b and TrmFO26 (red arrows). Both the *URA3* and *Mcap0613* genes produce fragments of 2.3 kb, but can be differentiated by *PstI* cleavage of *URA3* into bands of 1.0 and 1.3 kb. These mutants were further analyzed by multiplex PCR and PFGE (not shown). Abbreviations; W303-*Mcap*, DNA purified from W303 yeast strain containing a *Mcap*-CAH genome; W303-cl3.2, DNA purified from yeast strain W303- $\Delta$ *Mcap0476* (clone 3.2); other abbreviations as in Supplementary Figure 2.

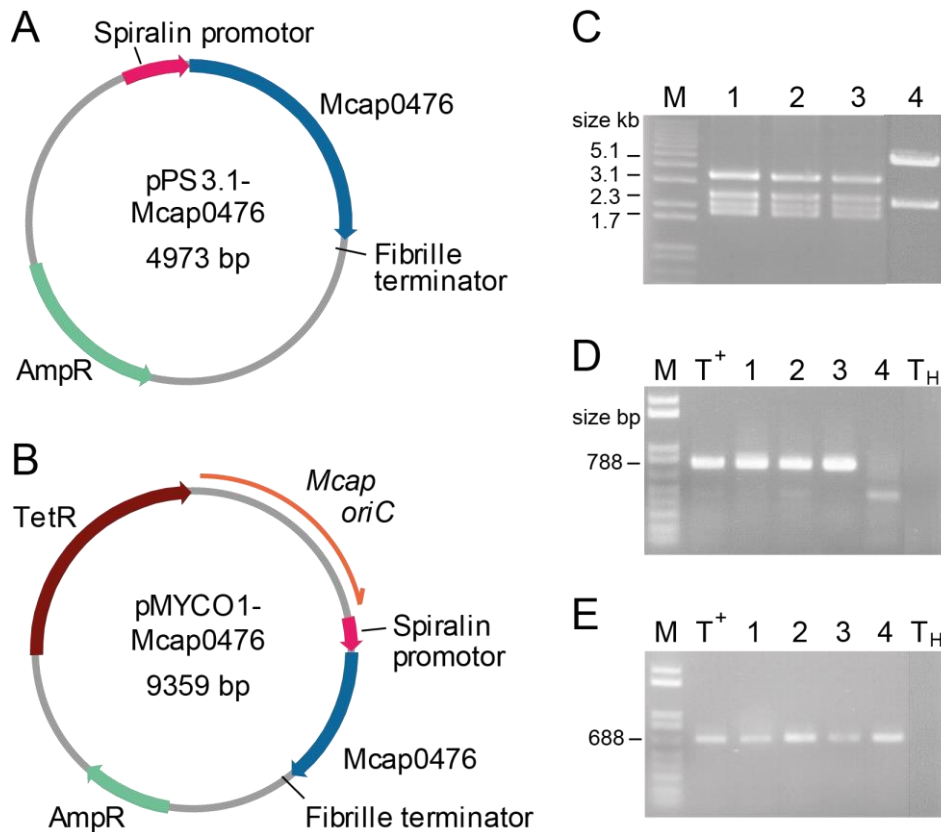

**Supplementary Figure 5.** Complementation of the  $\Delta$ *Mcap0476* mutant by expression of *Mcap0476* from a plasmid. (A) Cloning of the *Mcap0476* gene into plasmids pPS3.1 and (B) pMYCO1 is described in Materials and Methods.  $\Delta$ *Mcap0476* cells were transformed with the pMYCO1-*Mcap0476* plasmid to express the wild-type *Mcap0476* enzyme in this knock-out strain. (C) After transformation, plasmids were isolated from tetracycline resistant colonies and their structures were tested by *Pst*I restriction analysis. Positive clones produce digestion products of 3.1, 2.3, 2 and 1.7 kb (lanes 1, 2, 3) whereas the empty pMYCO1 plasmid produces two bands at 5.1 and 2.3 kb (lane 4). (D) The clones were analyzed by RT-PCR (Materials and Methods) to screen for *Mcap0476* expression. Clones 1, 2 and 3 expressed *Mcap0476* mRNA giving rise to a cDNA product 788 bp. (E) All the four clones produced the *Mcap0613*-specific cDNA of 688 bp, showing that *Mcap0613* mRNA was still been transcribed. Clone 3 was selected for further analysis by MS. AmpR, ampicillin resistance gene; TetR, tetracycline resistant gene; *oriC*, origin of replication; other abbreviations as in Supplementary Figure 2.



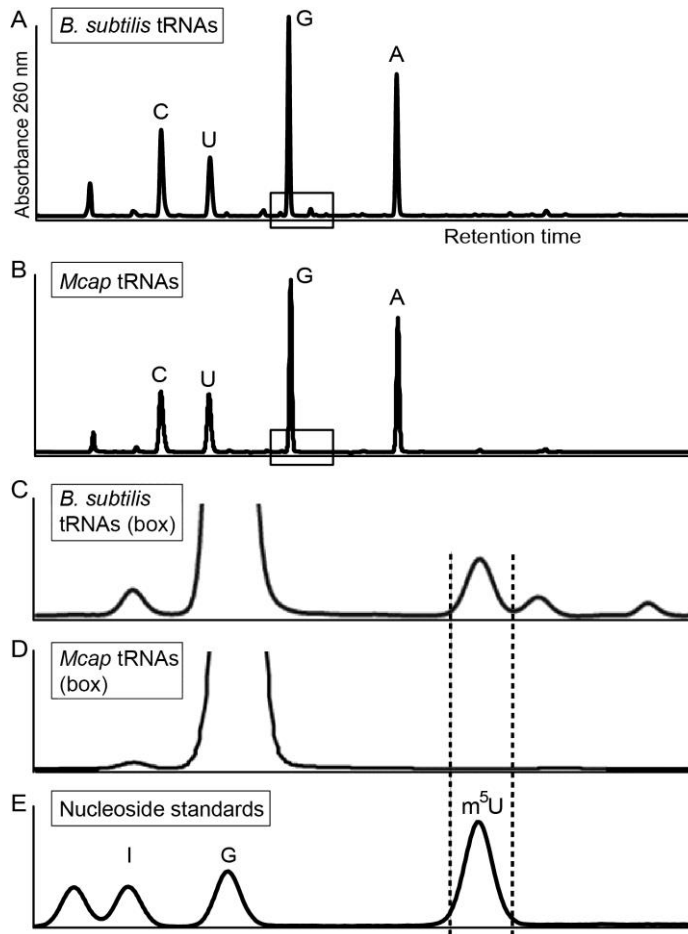

**Supplementary Figure 6.** HPLC profiles of tRNA nucleosides from bulk *Mcap* tRNA. (A) The digestion products of total tRNAs from the wild-type *B. subtilis* strain 168 (7) showing the positions of the unmodified nucleosides. (B) HPLC analysis of nucleosides derived from *Mcap*-CAH tRNAs. (C) Enlargement of the boxed region containing the *B. subtilis* m<sup>5</sup>U modification. (D) Enlargements of the same region for the *Mcap* tRNA nucleosides showing absence of m<sup>5</sup>U consistent with earlier reports for this species (8,9). (E) Nucleoside standardization mixture; the fractions corresponding to the retention times for inosine (I), guanosine and m<sup>5</sup>U are indicated.

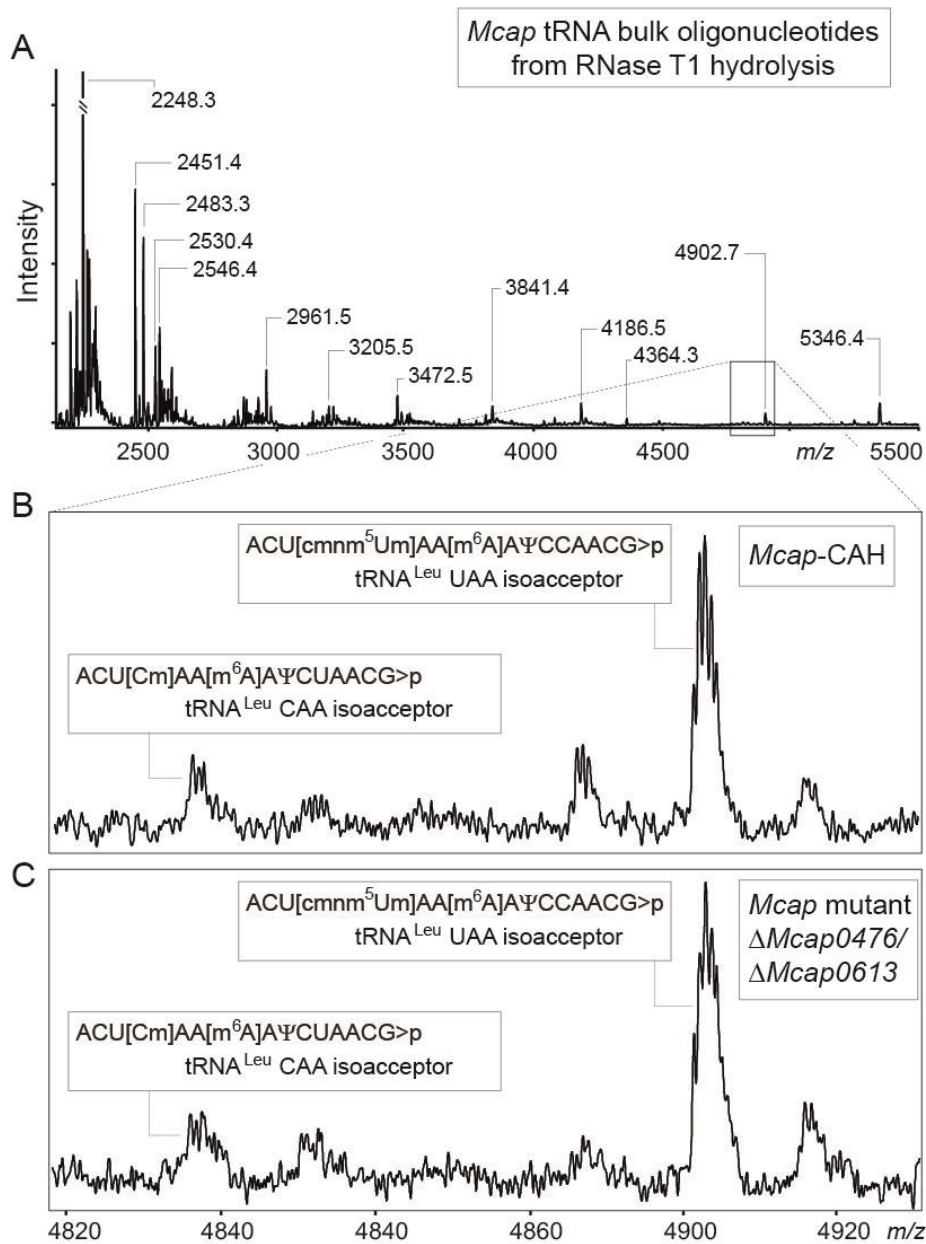

**Supplementary Figure 7. (A)** MALDI-MS analyses of bulk *Mcap* tRNAs after RNase T1 digestion. Oligonucleotides in the range  $m/z$  2300 to 5500 are shown, corresponding to heptamers and larger. The  $\text{cmnm}^5\text{U34}$  modification in the  $\text{tRNA}^{\text{Leu}}$  UAA isoacceptor migrates at  $m/z$  4902.7 in a 15-nucleotide fragment  $\text{ACU}[\text{cmnm}^5\text{Um}]\text{AA}[\text{m}^6\text{A}]\text{A}\Psi\text{CCAACGp}$  (boxed). This fully modified fragment is clearly evident in **(B)** the wild-type spectrum and also in **(C)** the spectrum from  $\Delta\text{Mcap0476}/\Delta\text{Mcap0613}$ , as well as from the individual  $\Delta\text{Mcap0476}$  and  $\Delta\text{Mcap0613}$  knock-out strains (not shown). The corresponding fragment from the  $\text{tRNA}^{\text{Leu}}$  CAA isoacceptor anticodon at  $m/z$  4833.7 lacks this modification, as do all tRNAs with C34 (10). The  $\text{UCU}[\text{cmnm}^5\text{Um}]\text{CA}[\text{m}^6\text{A}]\text{AACCGp}$  ( $m/z$  3933.5) fragment from  $\text{tRNA}^{\text{Trp}}$  contains  $\text{cmnm}^5\text{U34}$  in

the wild-type and all the knock-out strains (not shown). All  $m/z$  values given are for monoisotopic, singly-protonated oligonucleotides with a 2'-3'-cyclic phosphate (11). Most, but not all, of the large RNase T1 fragments could be assigned to predicted *Mcap* tRNA fragment masses including modifications (12). However, some peaks could not be assigned and a few expected peaks were missing indicating that the published list of modifications for *Mcap* tRNAs (12,13) is not fully comprehensive.

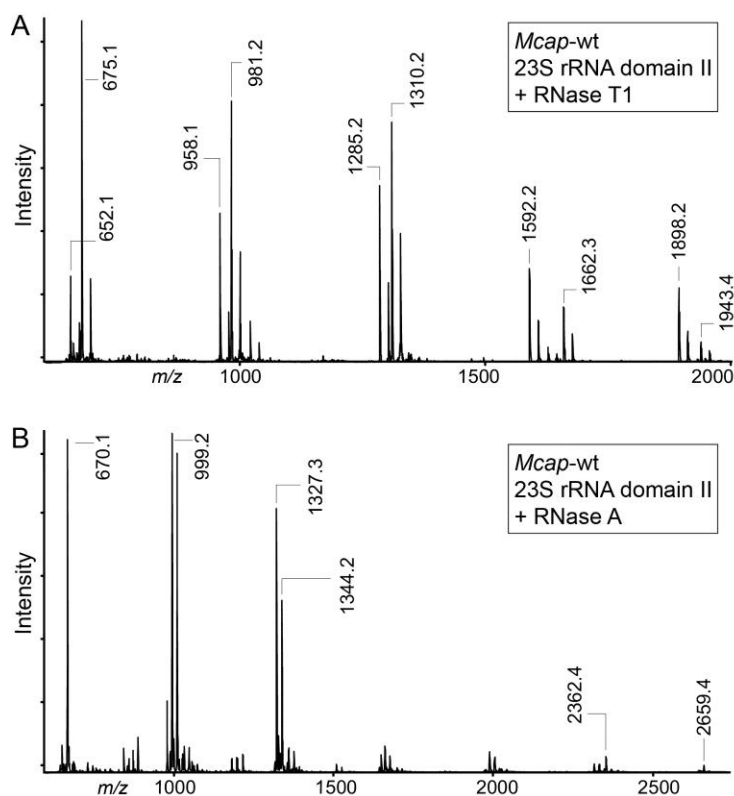

**Supplementary Figure 8.** MALDI-MS analyses of *Mcap* 23S rRNAs domain II showing the lack of modification at nucleotide U747. **(A)** Spectrum after RNase T1 digestion. Nucleotides U747 and G748 are in the trimer UUG>p at  $m/z$  958, and both are unmodified. The  $m/z$  958 fragment also contains U746, and the presence of a  $\Psi$ 746 synthase ortholog in *Mcap* (Figure 3) indicates that this uridine is probably isomerized. Nucleotide G745 is in the fragment UAUUCG>p at  $m/z$  1898 and is unmodified. **(B)** Spectrum after RNase A digestion where unmodified G748 is in the fragment GAAAAGACp at  $m/z$  2659.

**Supplementary Table 1. Additional PCR primer pairs used in this study**

| <b>Primers for multiplex PCR of <i>Mcap</i> genome</b> |                                       |                                       |                          |
|--------------------------------------------------------|---------------------------------------|---------------------------------------|--------------------------|
| <b>Primer name</b>                                     | <b>Sequence (5'→3')</b>               | <b>Location in <i>Mcap</i> genome</b> | <b>Size product (bp)</b> |
| Mcap Af                                                | ATGAACCTAAACGATATTTTAAAAGAACTC        | 1                                     | 100                      |
| Mcap Ar                                                | TATTAATTGTTTTAATATAGTCGTTATACACAG     | 100                                   |                          |
| Mcap Bf                                                | CTAACAGATCCAGCACCAGCTAC               | 100 001                               | 200                      |
| Mcap Br                                                | TCTTGATATTTTTGCAAAGTAATTTGTACTT       | 100 200                               |                          |
| Mcap Cf                                                | AATTATTGGAATTCACCAGTAAGTGATG          | 200 021                               | 300                      |
| Mcap Cr                                                | AATTTAGTTGTATTTAAATTAACCTCTTT         | 200 320                               |                          |
| Mcap Df                                                | TTTGATTGTTTCAAATTAACCTTTTAATTGCC      | 300 011                               | 400                      |
| Mcap Dr                                                | GAAATTGGAAAAATTTCTAAAACAATTTCTG       | 300 410                               |                          |
| Mcap Ef                                                | CGGCTTGAAAGGCTATTAATGCATCAAC          | 399 931                               | 510                      |
| Mcap Er                                                | TTGCTGTAGTTACTCATAATCAAATGTTG         | 400 440                               |                          |
| Mcap Ff                                                | AAGAAGTATAACTCACATACATAGGCG           | 500 101                               | 600                      |
| Mcap Fr                                                | ACATATTTAACATTAATTGTAAATTTTGATTATCTTC | 500 700                               |                          |
| Mcap Gf                                                | TATTGGTAGATAAGCATGATCAGTACC           | 600 061                               | 700                      |
| Mcap Gr                                                | AATTAGGAAGAGAACCTAATGCTGAAG           | 600 760                               |                          |
| Mcap Hf                                                | AGCTCCAGAAATTACTACAGTTGTTAAG          | 703 451                               | 800                      |
| Mcap Hr                                                | TCCATATTATATTATTGCTCCGCAAATAGC        | 704 250                               |                          |
| Mcap If                                                | CTAAATCTAAAATTCCACCCTACTAATAG         | 800 061                               | 900                      |
| Mcap Ir                                                | TGCAAGAAGTGTAAAGGTCCAAGAAAAAC         | 800 960                               |                          |
| Mcap Jf                                                | TTAAAGGATTATTTGTTGCTGGTGATGTTA        | 900 201                               | 1000                     |
| Mcap Jr                                                | AAATCAACCTAATAATAAGGCAATTGATTCATAG    | 901 200                               |                          |
| <b>PCR primers for investigating <i>Mcap</i> genes</b> |                                       |                                       |                          |
| TrmFO15a                                               | GAAGTTGGTGGTTTAACTCCAAG               | 5'-Mcap0476                           | 1 kb, 2 kb or<br>3.3 kb  |
| TrmFO16                                                | CTGAAATTAAGCTTCACC                    | 3'-Mcap0476                           |                          |
| TrmFO25b                                               | GAGTTTGTCAAATTCATTATCTG               | 5'-Mcap0613                           | 2.3 kb                   |
| TrmFO26                                                | CCACTTGCATTGCCATCATTG                 | 3'-Mcap0613                           |                          |

## References

1. Nishimasu, H., Ishitani, R., Yamashita, K., Iwashita, C., Hirata, A., Hori, H. and Nureki, O. (2009) Atomic structure of a folate/FAD-dependent tRNA T54 methyltransferase. *Proc Natl Acad Sci USA*, **106**, 8180-8185.
2. Hamdane, D., Argentini, M., Cornu, D., Myllykallio, H., Skouloubris, S., Hui-Bon-Hoa, G. and Golinelli-Pimpaneau, B. (2011) Insights into folate/FAD-dependent tRNA methyltransferase mechanism: role of two highly conserved cysteines in catalysis. *J.Biol. Chem.*, **286**, 36268-36280.
3. Zhang, Y. (2008) I-TASSER server for protein 3D structure prediction. *BMC Bioinformatics*, **9**, 40.
4. Motorin, Y. and Helm, M. (2011) RNA nucleotide methylation. *Wiley Interdis. Rev. RNA*, **2**, 611-631.
5. Kelley, L.A. and Sternberg, M.J. (2009) Protein structure prediction on the Web: a case study using the Phyre server. *Nat Protoc*, **4**, 363-371.
6. Lartigue, C., Vashee, S., Algire, M.A., Chuang, R.Y., Benders, G.A., Ma, L., Noskov, V.N., Denisova, E.A., Gibson, D.G., Assad-Garcia, N. *et al.* (2009) Creating bacterial strains from genomes that have been cloned and engineered in yeast. *Science*, **325**, 1693-1696.
7. Desmolaize, B., Fabret, C., Bregeon, D., Rose, S., Grosjean, H. and Douthwaite, S. (2011) A single methyltransferase YefA (RlmCD) catalyses both m<sup>5</sup>U747 and m<sup>5</sup>U1939 modifications in *Bacillus subtilis* 23S rRNA. *Nucleic Acids Res*, **39**, 9368-9375.
8. Hsueh, C.C. and Dubin, D.T. (1980) Methylation patterns of mycoplasma transfer and ribosomal ribonucleic acid. *J.Bacteriol.*, **144**, 991-998.
9. Johnson, L., Hayashi, H. and Söll, D. (1970) Isolation and properties of a transfer ribonucleic acid deficient in ribothymidine. *Biochemistry*, **9**, 2823-2831.
10. Armengod, M.E., Moukadiri, I., Prado, S., Ruiz-Partida, R., Benitez-Paez, A., Villarroya, M., Lomas, R., Garzon, M.J., Martinez-Zamora, A., Meseguer, S. *et al.* (2012) Enzymology of tRNA modification in the bacterial MnmEG pathway. *Biochimie*, **94**, 1510-1520.
11. Douthwaite, S. and Kirpekar, F. (2007) Identifying modifications in RNA by MALDI mass spectrometry. *Meth. Enzymol.*, **425**, 3-20.
12. Andachi, Y., Yamao, F., Muto, A. and Osawa, S. (1989) Codon recognition patterns as deduced from sequences of the complete set of transfer RNA species in *Mycoplasma capricolum*. Resemblance to mitochondria. *J.Mol. Biol.*, **209**, 37-54.
13. Machnicka, M.A., Milanowska, K., Osman Oglou, O., Purta, E., Kurkowska, M., Olchowik, A., Januszewski, W., Kalinowski, S., Dunin-Horkawicz, S., Rother, K.M. *et al.* (2013) MODOMICS: a database of RNA modification pathways - 2013 update. *Nucleic Acids Res*, **41**, D262-267.
